# Supplementary material for: Development of Topical Formulations Containing 20% of Coated and Uncoated Zinc Oxide Nanoparticles: Stability Assessment and Penetration Evaluation by Reflectance Confocal Laser Microscopy
Source: Preprints.org preprint supplement (doi:10.20944/preprints202309.1999.v1), 2023-09-28
Supplement: Supplementary file 1 [file supplementary]

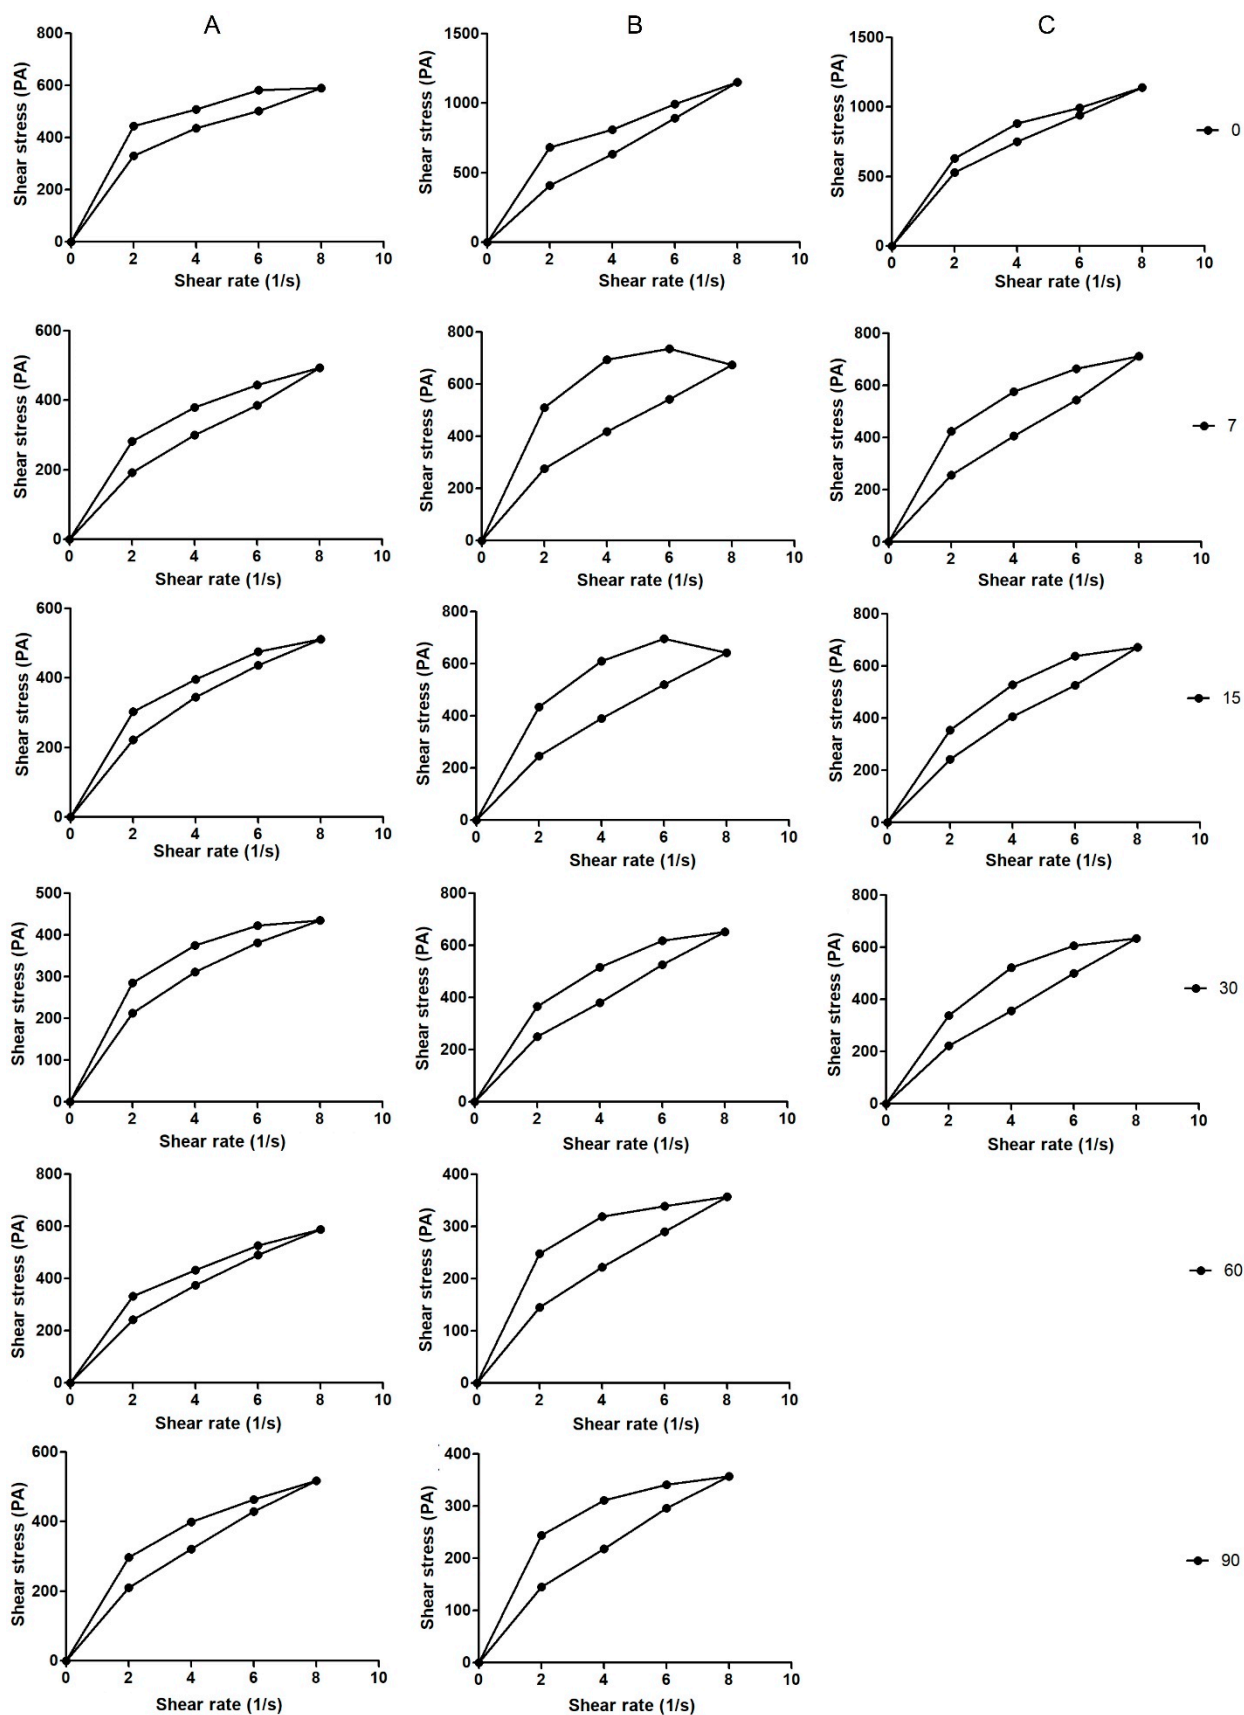

**Supplementary Figure 1.** Rheograms of the vehicle (A) and formulations containing the coated (B) and uncoated (C) Zinc Oxide nanoparticles incubated at 45 °C for 0, 7, 30, 60 and 90 days.

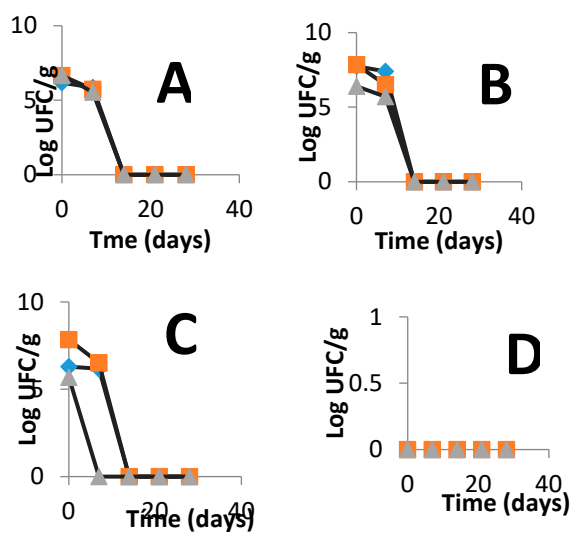

Supplementary Figure 2. Log of the number of surviving microorganisms, *E. coli* (A), *S. aureus* (B), *C. albicans* (C) and *P. aeruginosa* (D) as a function of the storage time at room temperature of the vehicle (◆), Z cote (■) and HP1 (▲) formulations.
